# Supplementary material
Source: HighWire-hosted journal article supplement (http://jpet.aspetjournals.org/highwire/filestream/144363/field_highwire_adjunct_files/0/255729SupplData.pdf)
Supplement: 255729SupplData.pdf [file 255729SupplData.pdf]

JPET # 255729

**Inhibition of methamphetamine self-administration and reinstatement by central blockade of angiotensin II receptor in rats**

<sup>1</sup>Xing Xu, <sup>1</sup>Jian Pan, <sup>2</sup>Xingxing Li, <sup>3</sup>Yan Cui, <sup>1</sup>Zijuan Mao, <sup>1</sup>Boliang Wu, <sup>3</sup>Huachong Xu, <sup>1,4</sup>Wenhua Zhou, <sup>1</sup>Yu Liu

<sup>1</sup> Ningbo University School of Medicine, 818 Fenghua Road, Ningbo, Zhejiang 315211, P. R. China

<sup>2</sup> Ningbo Kangning Hospital, 1 South Zhuangyu Road, Ningbo, Zhejiang 315201, P. R. China.

<sup>3</sup> Ningbo Public Security Bureau Ningbo Anti-drug Office, 36 Xibei Road, Zhejiang 315040, P. R. China

<sup>4</sup> Ningbo Addiction Research and Treatment Center, 21 Xibei Road, Zhejiang 315040, P. R. China

Table 1. Primer Sequences of Relevant Genes Designed for qPCR

| Genes                           | Forward primer                | Reverse primer               | Product length (bp) |
|---------------------------------|-------------------------------|------------------------------|---------------------|
| <i>rno-miR-219a-5p</i>          | CTGATTCCCTGATTGTCCA<br>AAC    | TATGCTTGTTCTCGTCTCTGT<br>GTC | 70                  |
| <i>U6</i>                       | CAGCACATATACTAAAATTG<br>GAACG | ACGAATTTGCGTGTCATCC          | 76                  |
| <i><math>\beta</math>-actin</i> | CTATCCTGGCCTCACTGTC<br>C      | ACAGTCCGCCTAGAAAGCATT        | 107                 |
| <i>Agtr1b</i>                   | CAATCTGGCTGTGGCTGA<br>CTT     | TGCACATCACAGGTCCAAAG<br>A    | 101                 |
| <i>PLC<math>\beta</math>1</i>   | TGTCTCCCGAGGCTCTACA<br>A      | TAGTAAGCGGGACTACACGC         | 108                 |
| <i>Creb1</i>                    | TGCAGACATTAACCATGAC<br>CA     | GTTGCTGGGCACTAGAATCT<br>G    | 104                 |

Figure 1

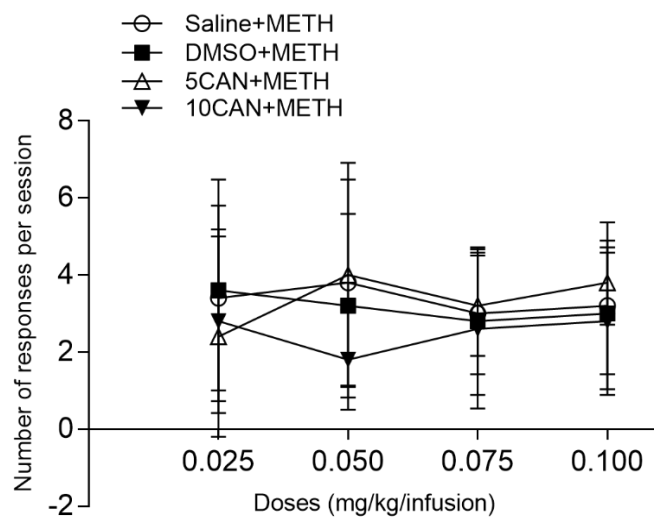

TWO-way repeated measure ANOVA was used to analyze the effect of 5 and 10 CAN on inactive nose-poke responses during the period of METH SA under FR1 schedule. There was no major effect of Group ( $F_{(3, 64)} = 0.089, p=0.966$ ), Dose ( $F_{(3, 64)} = 0.702, p=0.554$ ) and Group X Dose interaction ( $F_{(9, 64)} = 0.322, p=0.965$ ).

Figure 2

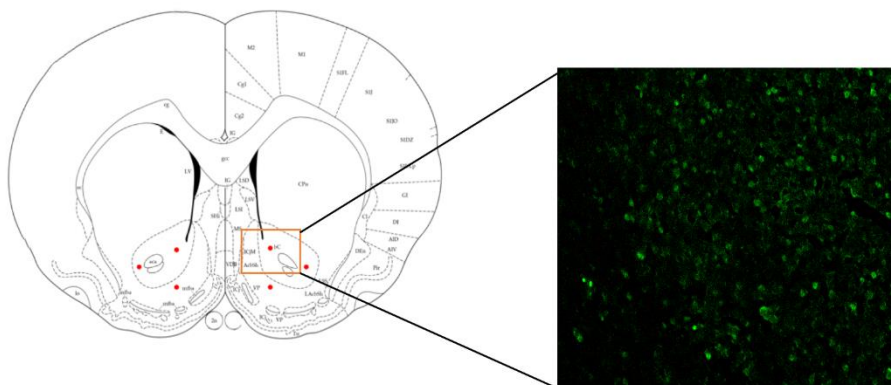

Following the micro-injection, the injection site of NAc for each animal was examined by a fluorescence microscope. Red circles in left panel are locations at which viral infusions were targeted in NAc. The right panel is the visualized overexpression of miR-219a-5p (shown by arrow) in LV1-miR-219a-5p rats. No infusion was found. The image is now included as the supplementary material.
